# Supplementary material for: Application of a carbon dioxide regenerated ion-exchange process for removing sulphate from drinking water: a simple approach to estimate process performance
Source: Royal Society of Chemistry journal article supplement (doi:10.1039/d2ew00655c), 2023-01-01
Supplement: d2ew00655c1.pdf [file d2ew00655c1.pdf]

## Electronic Supplementary Information

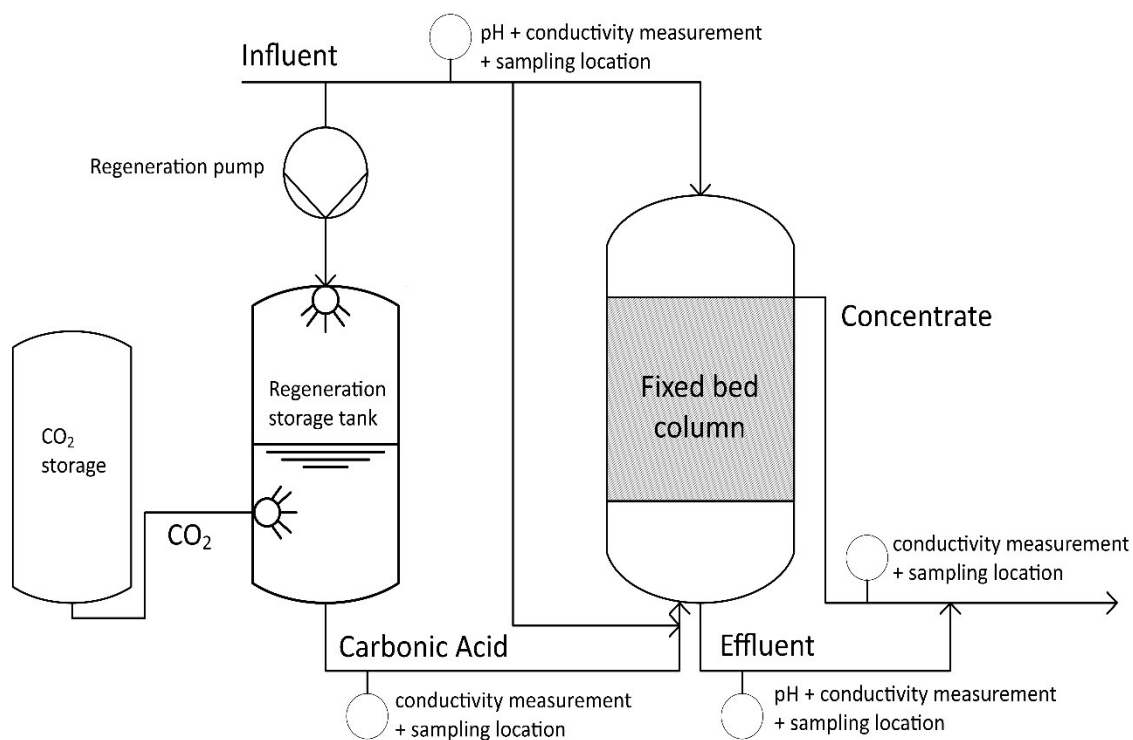

**Figure 1: Simplified pilot plant diagram**

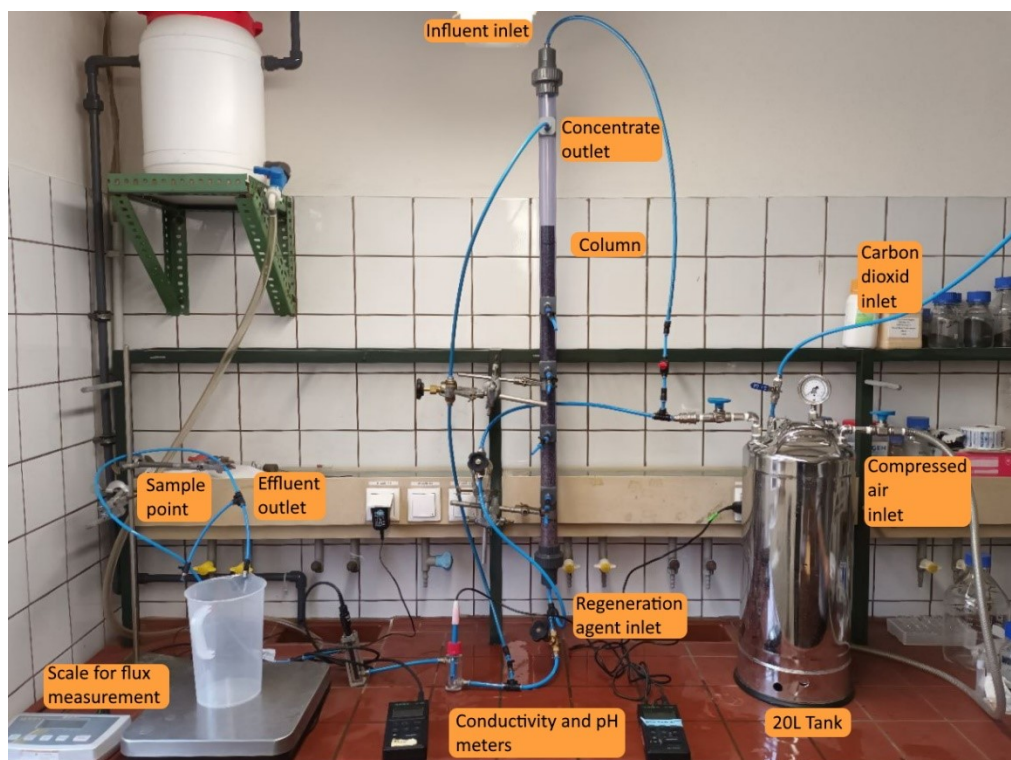

**Figure 2: Lab-scale plant**

**Table 1: Literature full-scale plant data used for regression analysis <sup>1</sup>**

| Full-scale Plant                                           | A       |       | B         |       | C     |       | D       |       | E     |       |
|------------------------------------------------------------|---------|-------|-----------|-------|-------|-------|---------|-------|-------|-------|
|                                                            | Infl.   | Effl. | Infl.     | Effl. | Infl. | Effl. | Infl.   | Effl. | Infl. | Effl. |
| Calcium in mg/L                                            | 134     | 76    | 112       | 70    | 164   | 72    | 185     | 78    | 150   | 63    |
| Magnesium in mg/L                                          | 26      | 16    | 25        | 15    | 27    | 12    | 26      | 11    | 48    | 20    |
| Water Hardness in mmol/L                                   | 4.43    | 2,59  | 3.84      | 2.38  | 5.22  | 2.31  | 5.71    | 2.41  | 5.75  | 2.41  |
| Alkalinity in mmol/L                                       | 6.09    | 4,00  | 4.47      | 2.72  | 6.70  | 3.60  | 6.00    | 2.50  | 7.11  | 3.60  |
| Sulphate in mg/L                                           | 90.0    | 28,0  | 151.0     | 101.0 | 149.0 | 28.0  | 135.0   | 36.0  | 159.0 | 28.0  |
| Nitrate in mg/L                                            | 42.0    | 30,0  | 16.0      | 14.0  | 25.0  | 19.0  | 40.0    | 26.0  | 17.0  | 11.0  |
| Chloride in mg/L                                           | 20.0    | 15,0  | 37.0      | 32.0  | 38.0  | 35.0  | 98.0    | 69.0  | 31.0  | 23.0  |
| Max. influent flow rate in m <sup>3</sup> /h               | 400     |       | 260       |       | 170   |       | 120     |       | 650   |       |
| Avg. bypass in m <sup>3</sup> /h                           | 80      |       | 0         |       | 0     |       | 0       |       | 0     |       |
| Number of Fixed Bed Columns                                | 3       |       | 3         |       | 3     |       | 3       |       | 2x3   |       |
| Throughput (Service Cycle) in BV                           | 50      |       |           |       | 50    |       | Unknown |       | 33    |       |
| Empty Bed Flow Rate (Service Cycle) in m/h                 | 9-12    |       | 16        |       | 7     |       | 7.5     |       | 7-11  |       |
| Ratio WAC/SBA per Column in m <sup>3</sup> /m <sup>3</sup> | 17/21.3 |       | 19.7/12.3 |       | 18/15 |       | 10/10   |       | 25/25 |       |
| Throughput (Regeneration) in BV                            | 6       |       | 5         |       | 5.5   |       | 5       |       | 6     |       |
| Empty Bed Flow Rate (Regeneration) in m/h                  | 5       |       | 7         |       | 3     |       | 5       |       | 5.3   |       |

## References

- 1 DVGW, *Zentrale Enthärtung in der Trinkwasserversorgung - Ionenaustauschverfahren*, Deutscher Verein des Gas- und Wasserfaches, 2012.
